# Supplementary material for: Nanocrystals of [Cu3(btc)2] (HKUST-1): a combined time-resolved light scattering and scanning electron microscopy study
Source: Royal Society of Chemistry journal article supplement (doi:10.1039/b819580c), 2009-01-01
Supplement: b819580c.pdf [file b819580c.pdf]

## Supporting Information

# Nanocrystals of $[\text{Cu}_3(\text{btc})_2]$ (HKUST-1): A Combined Time Resolved Light Scattering and Scanning Electron Microscopy Study.

Denise Zacher, Jianing Liu, Klaus Huber and Roland A. Fischer

<sup>a</sup> *Anorganische Chemie II, Ruhr-Universität Bochum, Universitätsstrasse 150, 44780, Bochum, Germany, Fax: +49 (0)234 32-14174; Tel: +49 (0)234 32-24174; E-mail:*

*roland.fischer@ruhr-uni-bochum.de*

<sup>b</sup> *Physikalische Chemie, University Paderborn, Bochum, Germany, Fax: +49 (0) 05251-60-4208; Tel: +49 (0) 05251-60-2125; E-mail: klaus.huber@upb.de.*

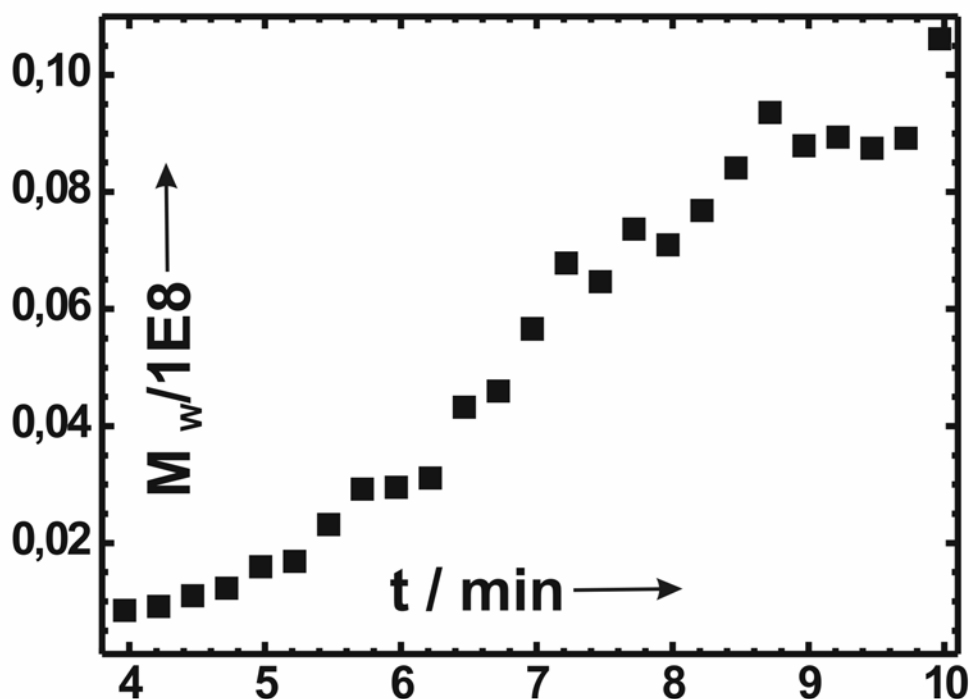

Figure S1.

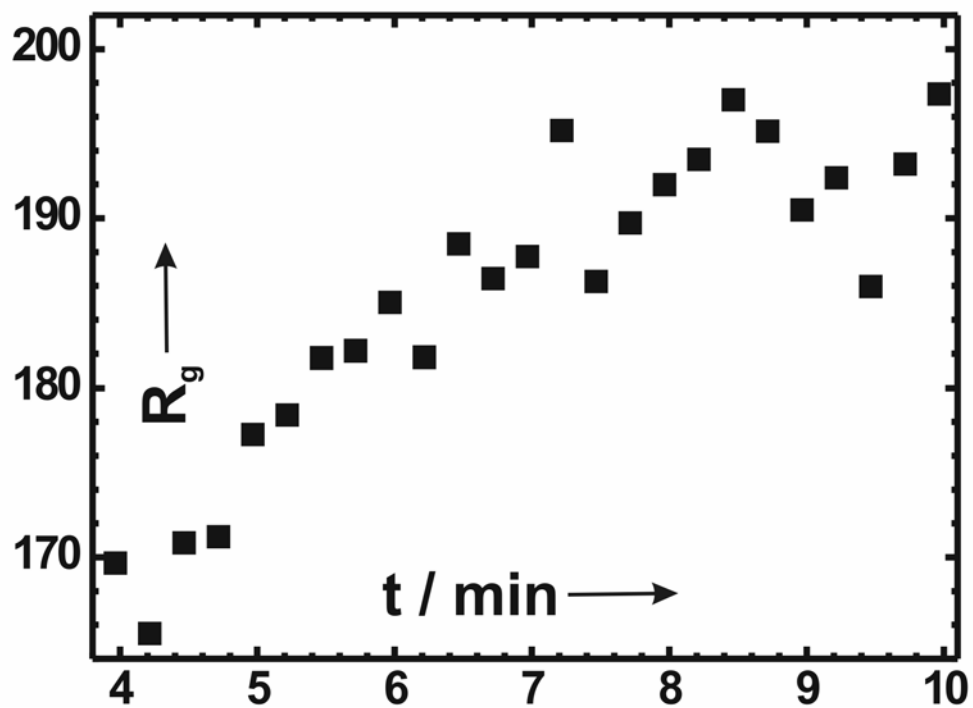

Figure S2.

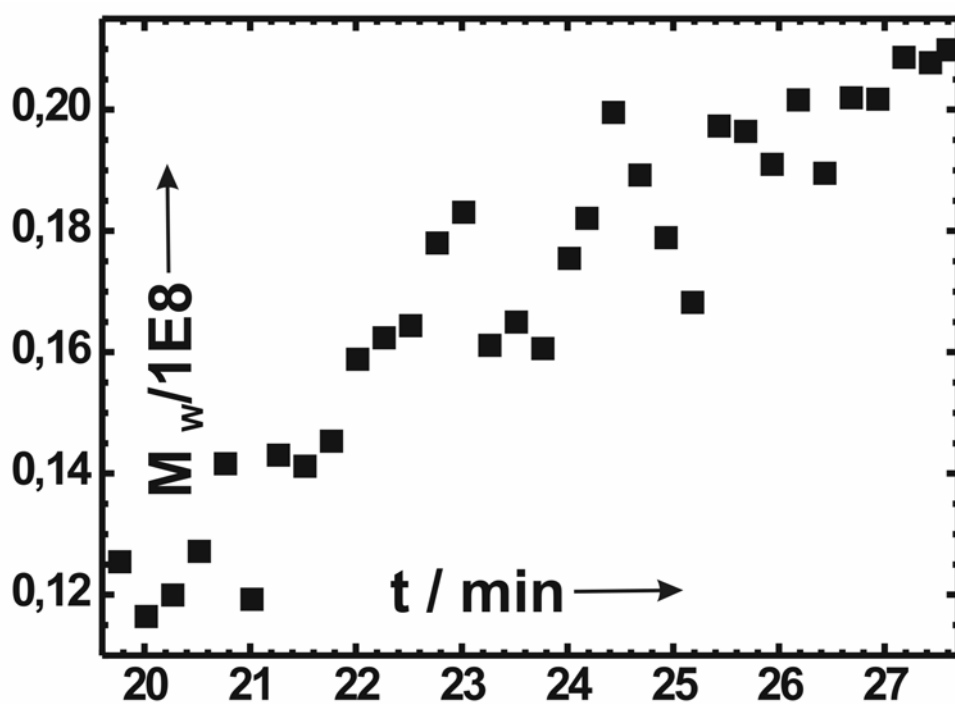

Figure S3.

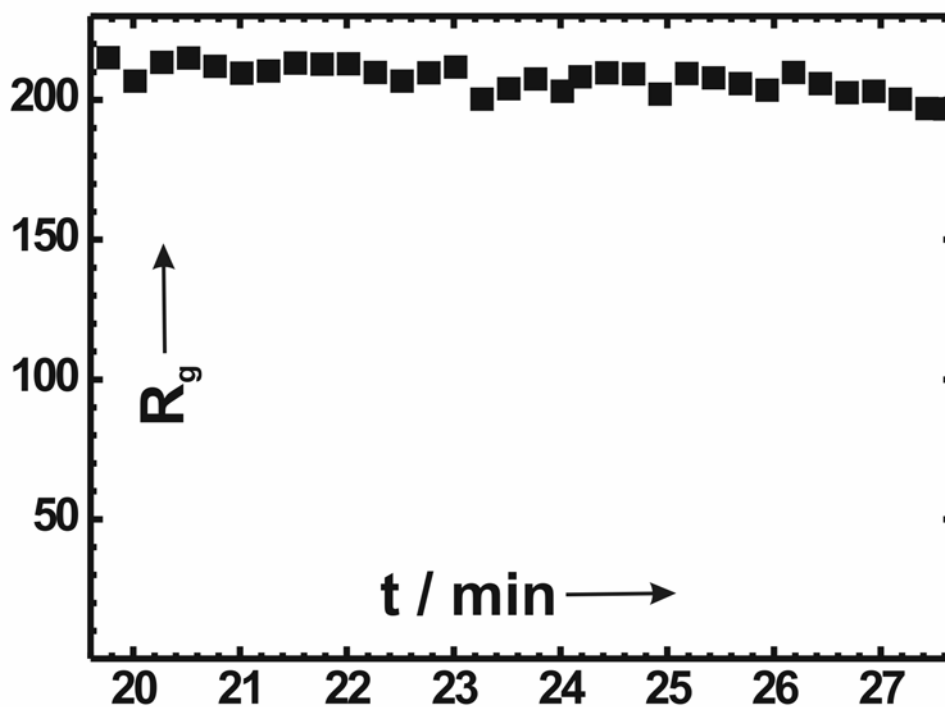

Figure S4.

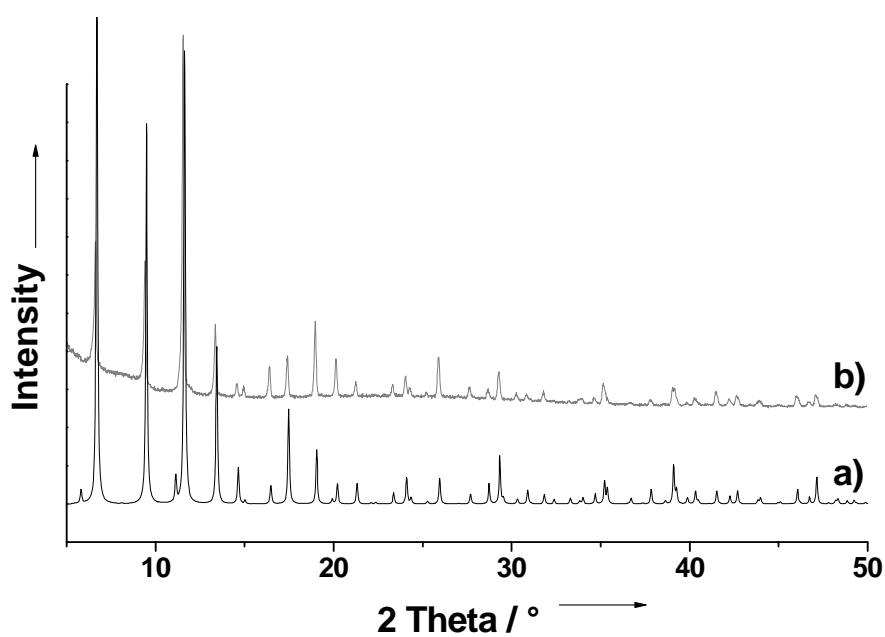

Figure S5. XRD patterns of a)  $[\text{Cu}_3(\text{btc})_2]$  reference and b)  $[\text{Cu}_3(\text{btc})_2]$  crystals collected out of the reaction mixture 1 hr after the TLS measurement.

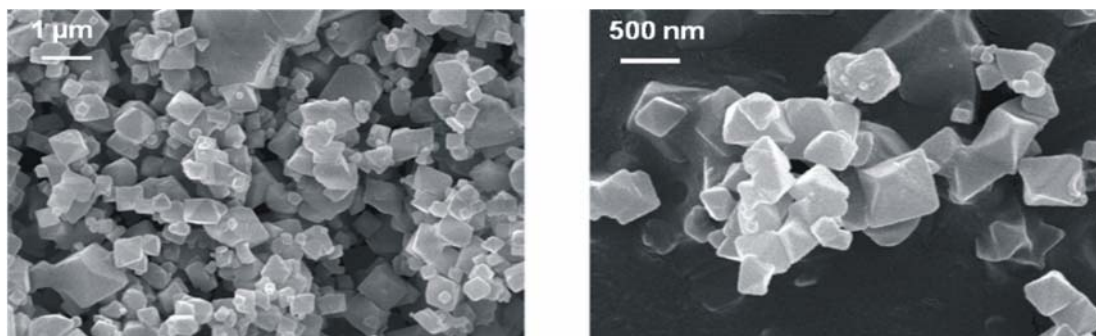

**Figure S6.** SEM images of  $[\text{Cu}_3(\text{btc})_2]$  crystals precipitated from the reaction mixture after 2 hrs.

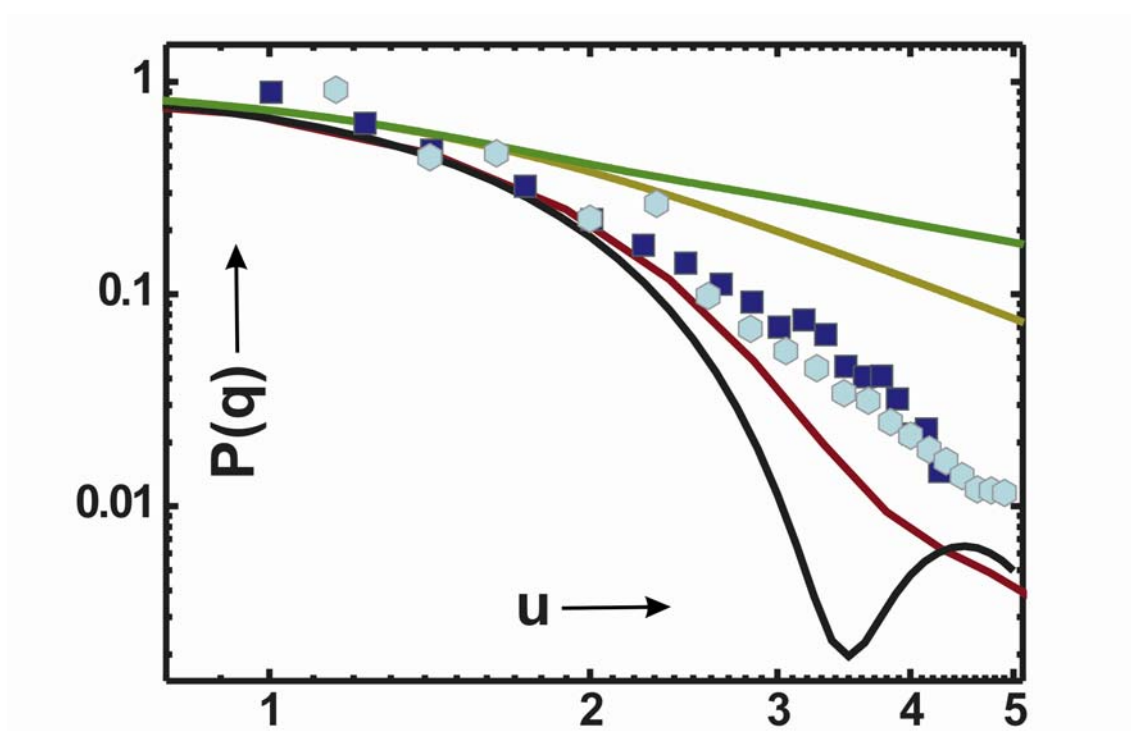

**Figure S7.**

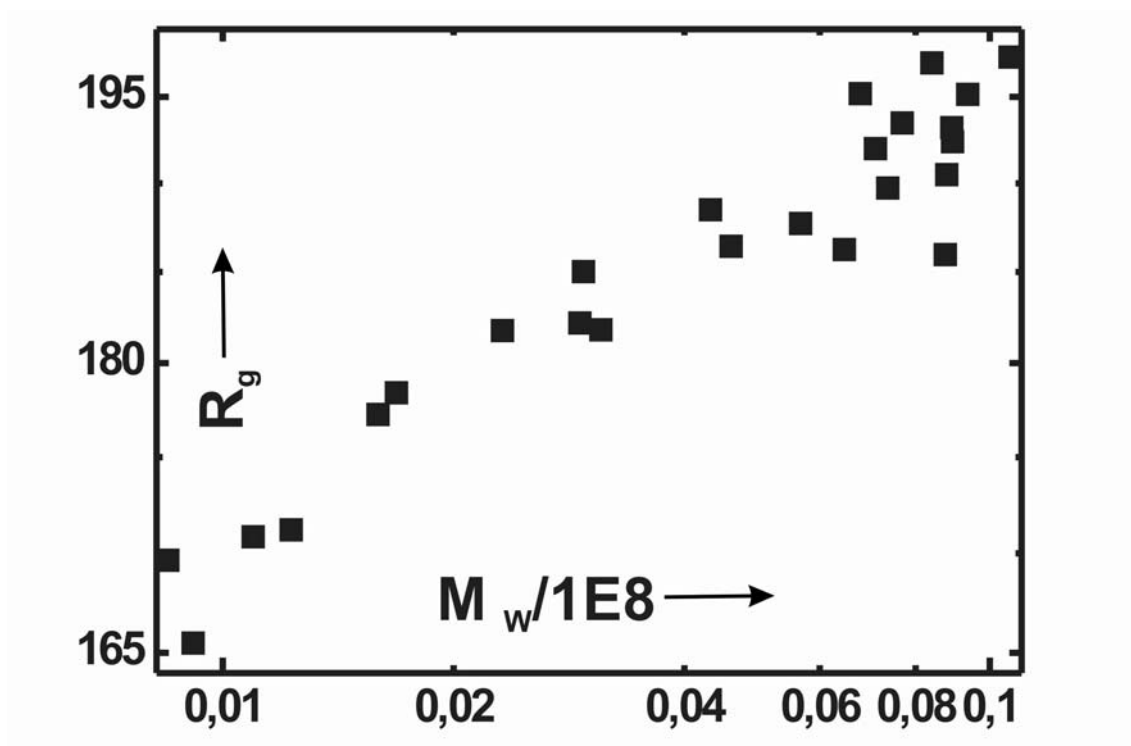

Figure S8.

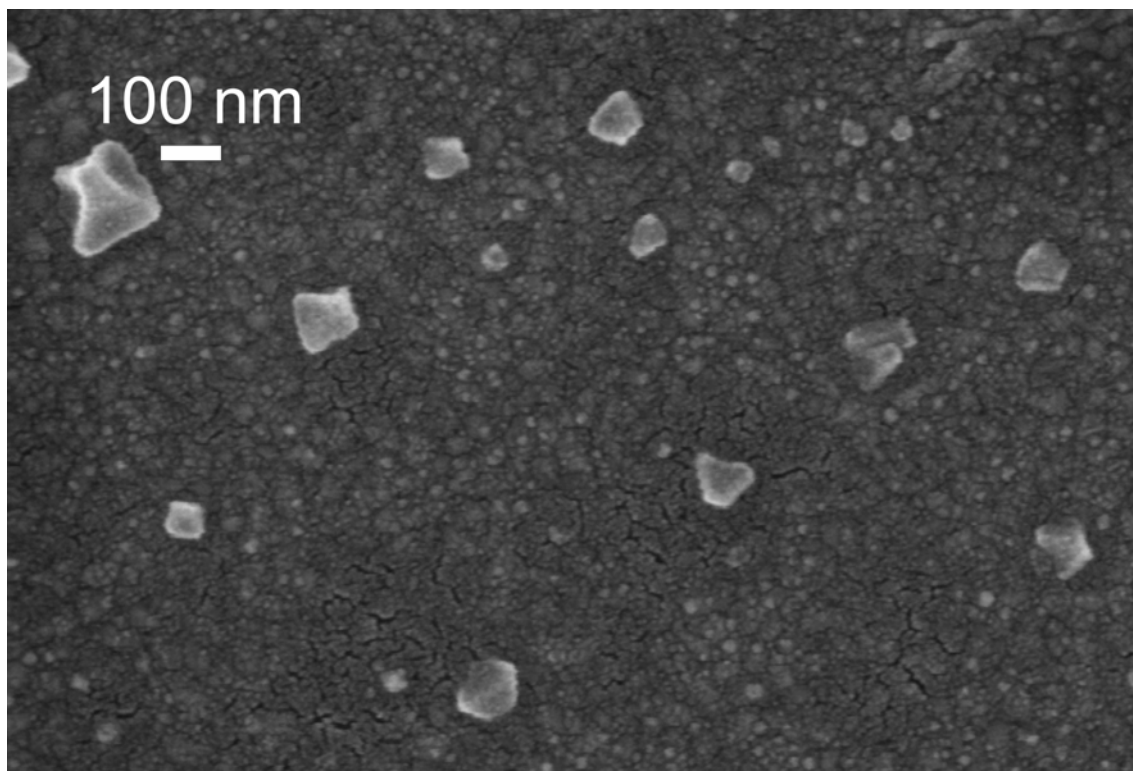

**Figure S9.**

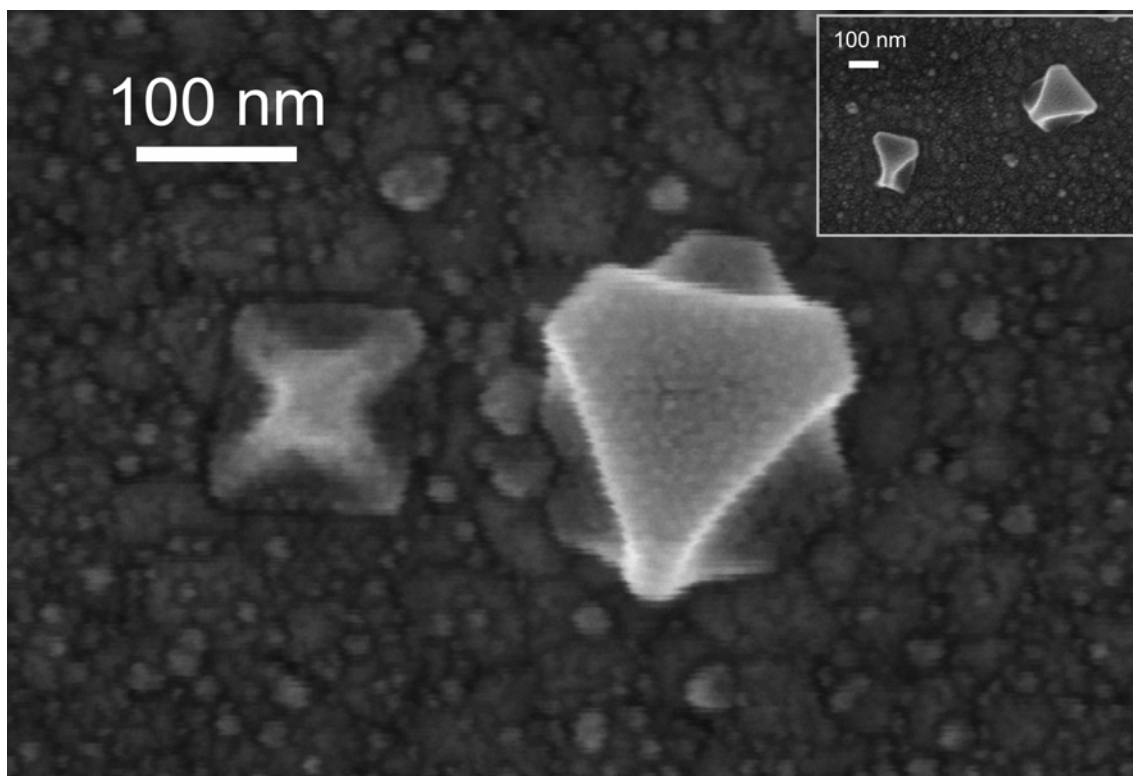

**Figure S10.**

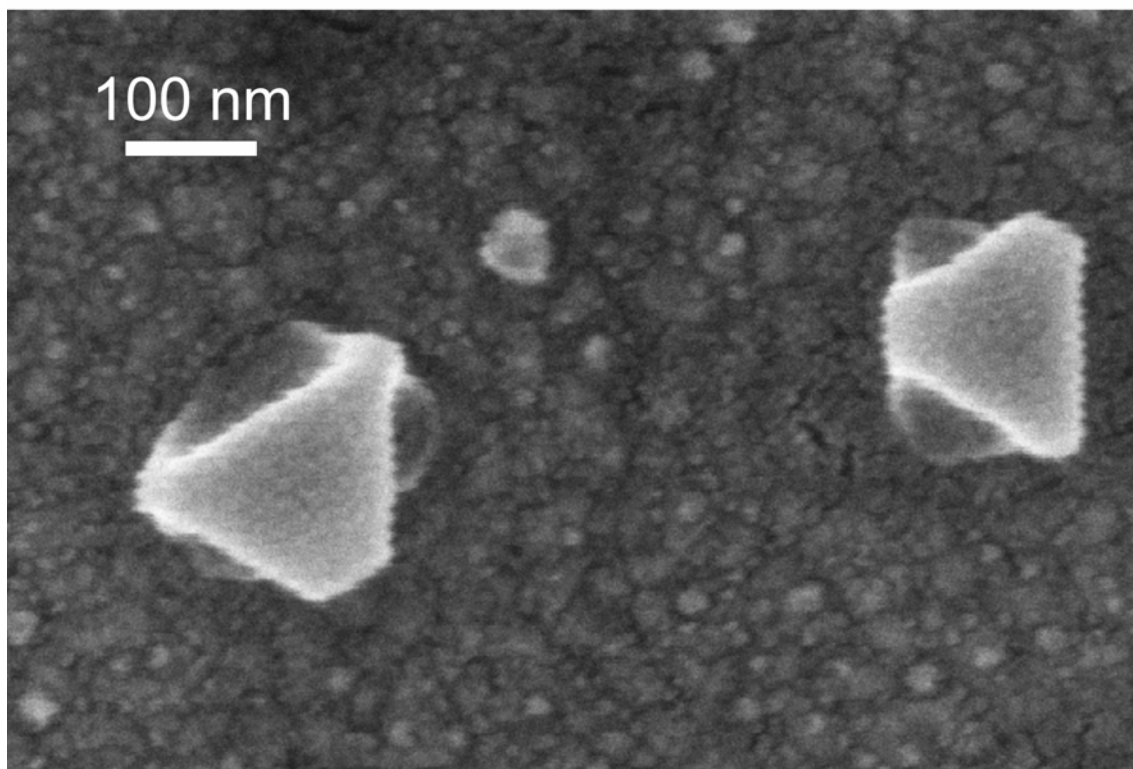

**Figure S11.**

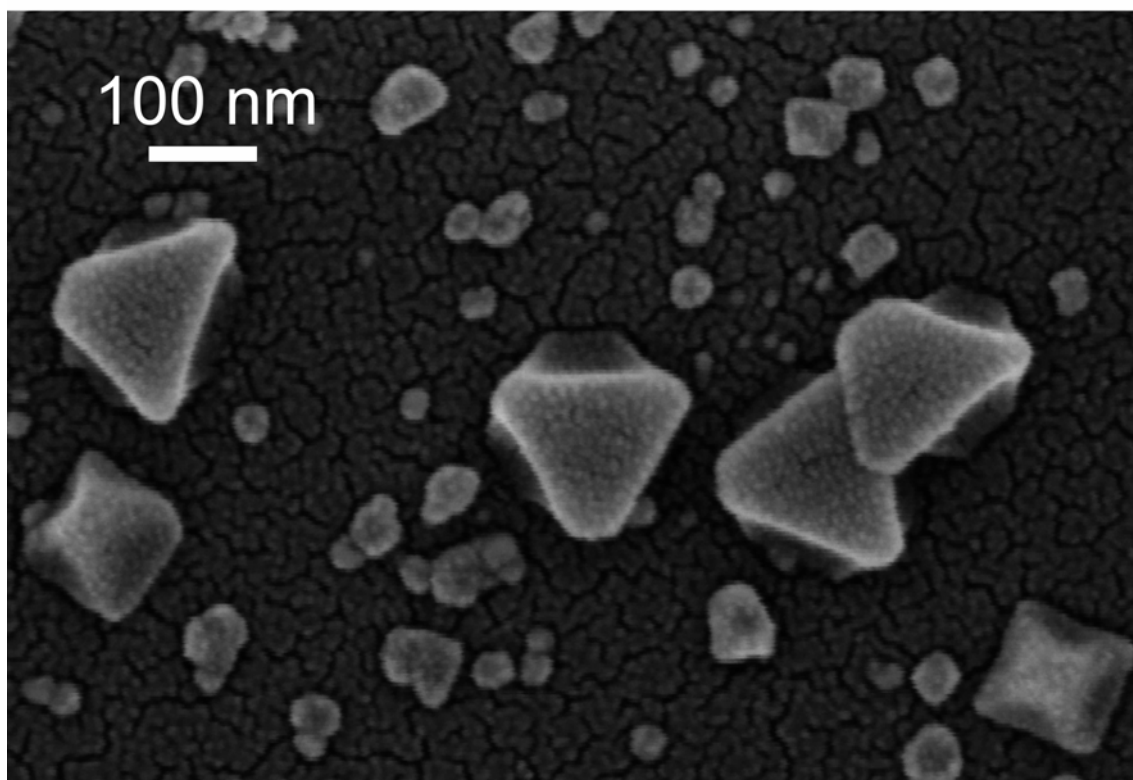

**Figure S12.**
